# Supplementary material for: Moisture effects on the electrochemical reaction and resistance switching at Ag/molybdenum oxide interfaces
Source: Royal Society of Chemistry journal article supplement (doi:10.1039/c6cp00823b), 2016-01-01
Supplement: c6cp00823b1.pdf [file c6cp00823b1.pdf]

## Supplementary Information

### Moisture effects on the electrochemical reaction and resistance switching at silver/molybdenum oxide interfaces

Chuan-Sen Yang,<sup>a</sup> Da-Shan Shang,<sup>\*a</sup> Yi-Sheng Chai,<sup>a</sup> Li-Qin Yan,<sup>a</sup> Bao-Gen Shen,<sup>a</sup> Young Sun,<sup>\*a</sup>

<sup>a</sup>Beijing National Laboratory for Condensed Matter Physics, Institute of Physics, Chinese Academy of Sciences, Beijing 100190, P. R. China  
E-mail: shangdashan@iphy.ac.cn; youngsun@iphy.ac.cn

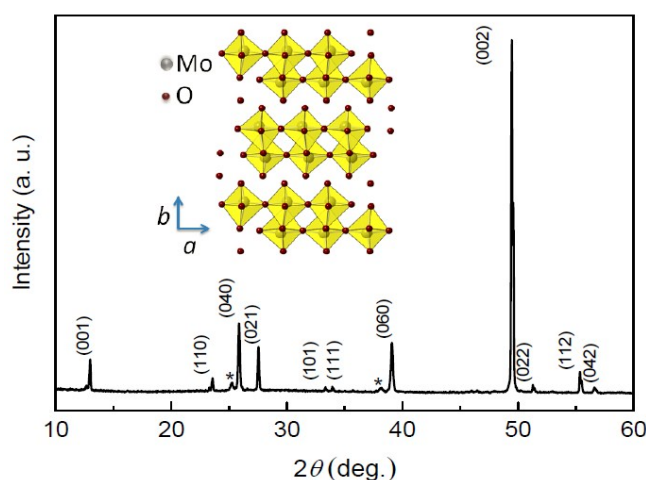

**Fig. S1** Structure and morphology of the MoO<sub>3-x</sub> (x~0.2) film. (a) The XRD pattern of the film. The symbol (\*) indicates the peak positions of FTO substrate. The inset shows the orthorhombic polycrystalline structure with layers consisting of distorted MoO<sub>6</sub> octahedral.

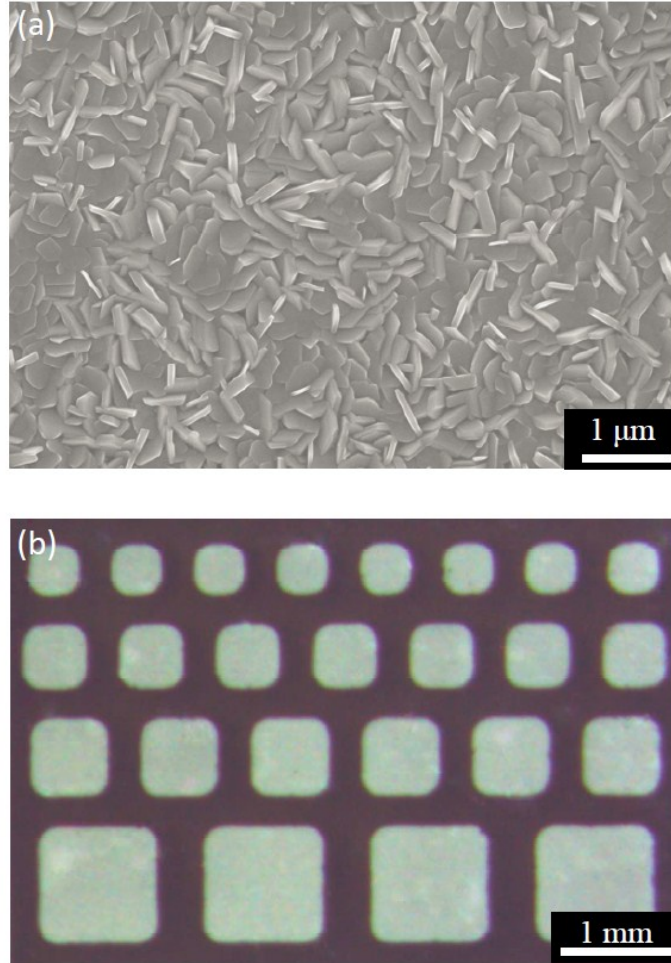

**Fig. S2** (a) Top-view SEM image of the prepared MoO<sub>3-x</sub> film. It shows a polycrystalline microstructure with plate-shaped grains randomly piled up together. (b) Photography of the measured cells with different top electrode sizes.
